# Supplementary material for: Capturing colloidal nano- and microplastics with plant-based nanocellulose networks
Source: PubMed Central journal article supplement (PMC8983699; doi:10.1038/s41467-022-29446-7), 2022-04-05
Supplement: 41467_2022_29446_MOESM3_ESM.pdf [file 41467_2022_29446_MOESM3_ESM.pdf]

## Description of Additional Supplementary Files

### Capturing colloidal nano- and microplastics with plant-based nanocellulose networks

Ilona Leppänen<sup>1</sup>, Timo Lappalainen<sup>1</sup>, Tia Lohtander<sup>1,2</sup>, Christopher Jonkergouw<sup>3</sup>, Suvi Arola<sup>1\*</sup> and  
Tekla Tammelin<sup>1\*</sup>

**File Name:** Supplementary Video 1

**Description:** Accumulation of fluorescently labelled polystyrene particles (PS( $\varnothing$ 1 $\mu$ m)) in microfluidic traps containing nanocellulose (native CNF) hydrogel. The capture of particles is verified using the microfluidic set-up and fluorescent imaging.
